# Supplementary material for: The Glutathione Peroxidase Gene Family in Thellungiella salsuginea: Genome-Wide Identification, Classification, and Gene and Protein Expression Analysis under Stress Conditions
Source: PubMed Central journal article supplement (PMC3958914; doi:10.3390/ijms15023319), 2014-02-21

## Supplementary Information

**Table S1.** *TsGPX* genes related ESTs in GenBank.

| Gene name     | Number of ESTs | Accession number                                                        |
|---------------|----------------|-------------------------------------------------------------------------|
| <i>TsGPX1</i> | 7              | BY805042, BY834089, BY814638, BY831158,<br>BY805041, BY831159, BY834088 |
| <i>TsGPX2</i> | 1              | FJ357243                                                                |
| <i>TsGPX3</i> | 1              | BY825912                                                                |
| <i>TsGPX5</i> | 1              | BY818373                                                                |
| <i>TsGPX6</i> | 2              | BM985497, BM986105                                                      |
| <i>TsGPX7</i> | 2              | BY816539, DN774281                                                      |
| <i>TsGPX8</i> | 1              | BY806901                                                                |

**Table S2.** Gene specific primers used in 3' RACE.

| Gene name          | Primer sequences (5'–3') |
|--------------------|--------------------------|
| <i>TsGPX3</i> _SP1 | CCTTATTCTCCAGCCATCGT     |
| <i>TsGPX3</i> _SP2 | GGAATGATGTGAGTTTGAGCCAG  |
| <i>TsGPX5</i> _SP1 | CCGAGAAATCCATCCACCAA     |
| <i>TsGPX5</i> _SP2 | GCTTCTAAATGCGGTTTCACG    |
| <i>TsGPX7</i> _SP1 | AACCAAACCCAATCCACCTCG    |
| <i>TsGPX7</i> _SP2 | ATGTCAATGGACCGAGCAC      |

**Table S3.** Primers used for isolating the CDs of *TsGPX* genes.

| Gene name     | Forward primers (5'–3')   | Reverse primers (5'–3')     |
|---------------|---------------------------|-----------------------------|
| <i>TsGPX1</i> | ATGGCTTCTTCTTCTTACGCAC    | CCATGACCGGTAACATTAAGATTC    |
| <i>TsGPX2</i> | CTCAGAAAGAGACCAACGACAC    | CATCCATGAAACGGCATCTCAACAATG |
| <i>TsGPX3</i> | TGTCGATGCCTAAATCAAGC      | GAAAATGAGATTCACACTGGTACTC   |
| <i>TsGPX4</i> | GGGAGATAGAGATGGGTGCT      | CATGATTAACCGGGATGGTG        |
| <i>TsGPX5</i> | GAGGACAAAACCTGGCGAGAG     | CAATTCGGAGAGTCGTAGCC        |
| <i>TsGPX6</i> | GCAAATGCTTCGCTCCTCAATTCTG | CCCAAATACACTCAAGAACTCAGACAG |
| <i>TsGPX7</i> | GTAATGGCTTCTTCTTACGCACCA  | TACGATGCACACATGGGAAC        |
| <i>TsGPX8</i> | CGTCTCTCATTCTCCTGCTTCTG   | GGAGATATTCAGAAGCTTCTTTATGTC |

**Table S4.** *AtGPX* genes expression under salt and drought stresses. The data were manually extracted from AtGenExpress. Highlighted data denote significant up-regulation (>1.5-fold).

| Salt stress: 150 mM NaCl |            |           |           |            |
|--------------------------|------------|-----------|-----------|------------|
| Shoot                    |            |           |           |            |
|                          | 0 h        | 6 h       | 12 h      | 24 h       |
| <i>GPX1</i>              | 10064.4044 | 6895.3897 | 2701.4183 | 6239.0952  |
| <i>GPX2</i>              | 5246.3739  | 5447.4280 | 3024.1973 | 9346.0837  |
| <i>GPX3</i>              | 159.9263   | 219.3388  | 213.3176  | 207.4407   |
| <i>GPX4</i>              | 7.4473     | 6.6617    | 6.1240    | 7.0386     |
| <i>GPX5</i>              | 323.0878   | 430.1305  | 389.1488  | 416.5335   |
| <i>GPX6</i>              | 541.5357   | 3902.5248 | 2696.5284 | 1118.0756  |
| <i>GPX7</i>              | 1279.2264  | 118.8702  | 28.1226   | 1058.7937  |
| <i>GPX8</i>              | 290.7771   | 428.4135  | 458.2031  | 346.8564   |
| Root                     |            |           |           |            |
|                          | 0 h        | 6 h       | 12 h      | 24 h       |
| <i>GPX1</i>              | 389.8374   | 223.8204  | 450.2026  | 590.9868   |
| <i>GPX2</i>              | 5586.5607  | 3906.6186 | 7840.4588 | 6560.5704  |
| <i>GPX3</i>              | 294.3101   | 153.1334  | 256.1301  | 269.7614   |
| <i>GPX4</i>              | 8.1259     | 14.5233   | 8.1488    | 10.6864    |
| <i>GPX5</i>              | 653.3744   | 432.7572  | 509.1552  | 567.7098   |
| <i>GPX6</i>              | 3112.7230  | 5896.1167 | 5051.1119 | 3453.4035  |
| <i>GPX7</i>              | 10.5994    | 12.9030   | 14.6064   | 14.1410    |
| <i>GPX8</i>              | 1643.8376  | 643.7455  | 934.3056  | 982.2966   |
| Drought stress           |            |           |           |            |
| Shoot                    |            |           |           |            |
|                          | 0 h        | 6 h       | 12 h      | 24 h       |
| <i>GPX1</i>              | 10064.4044 | 8515.1334 | 3248.3612 | 12107.0491 |
| <i>GPX2</i>              | 5246.3739  | 2759.6138 | 2582.8341 | 3981.7766  |
| <i>GPX3</i>              | 159.9263   | 298.8367  | 249.6073  | 154.7041   |
| <i>GPX4</i>              | 7.4473     | 5.2068    | 7.1161    | 7.6206     |
| <i>GPX5</i>              | 323.0878   | 412.5666  | 386.3245  | 330.3208   |
| <i>GPX6</i>              | 541.5357   | 2626.6964 | 1635.7669 | 368.6772   |
| <i>GPX7</i>              | 1279.2264  | 54.3319   | 25.7462   | 805.2453   |
| <i>GPX8</i>              | 290.7771   | 399.8747  | 494.3356  | 200.2977   |
| Root                     |            |           |           |            |
|                          | 0 h        | 6 h       | 12 h      | 24 h       |
| <i>GPX1</i>              | 389.8374   | 572.1580  | 364.2638  | 457.8970   |
| <i>GPX2</i>              | 5586.5607  | 4586.6898 | 4651.6141 | 3580.1164  |
| <i>GPX3</i>              | 294.3101   | 350.1968  | 304.0444  | 287.5815   |
| <i>GPX4</i>              | 8.1259     | 6.3090    | 6.9119    | 6.6159     |
| <i>GPX5</i>              | 653.3744   | 507.4506  | 487.5507  | 587.0016   |
| <i>GPX6</i>              | 3112.7230  | 4358.5389 | 3790.3118 | 2432.0862  |
| <i>GPX7</i>              | 10.5994    | 15.3150   | 10.7799   | 13.6470    |
| <i>GPX8</i>              | 1643.8376  | 1413.9898 | 1161.6843 | 1242.5744  |

**Table S5.** The synthetic peptides used for TsGPXs antibodies preparation.

| GPXs          | Peptide sequences    |
|---------------|----------------------|
| TsGPX1        | FNGSRPNPSVKPAAFLASC  |
| TsGPX2        | SPDGKVFQRYSPRTSPLC   |
| TsGPX3        | FVFYLYRYPYSPAIVEHC   |
| TsGPX4/TsGPX5 | CLVGKDGQVIDRYGPT     |
| TsGPX6        | CTTGAKLSRSGHSMMAATS  |
| TsGPX7        | CPSKNFSTETSNSRNLRNGV |
| TsGPX8        | DKTGQAVERYYPPTSPLTLC |

**Table S6.** Primers used for quantitative real-time RT-PCR analysis.

| Gene            | Forward Primers (5'–3')   | Reverse Primers (5'–3')   |
|-----------------|---------------------------|---------------------------|
| <i>TsGPX1</i>   | ATCAATTTGGTGGCCAAGAG      | AAGAATCCTCCTGCGTTTGA      |
| <i>TsGPX2</i>   | GGGACAAGAACCAGGAAACA      | AGACTTTGCCGTCAGGAGAA      |
| <i>TsGPX3</i>   | ACCTGGTAGCAACGAGGAGA      | TGGAGCATATCGATCCACAA      |
| <i>TsGPX4</i>   | CATTCCCTTGCAACCAGTTT      | GGCCGTAACGATCAATCACT      |
| <i>TsGPX5</i>   | GAGGACAAAACCTGGCGAGAG     | AAACGCCAAGATCACAAACC      |
| <i>TsGPX6</i>   | TCGTCCTCTTCCTTTATCGACAACG | CGCATCCTTCACGGTGAAATCATAG |
| <i>TsGPX7</i>   | GACCGAGCACAGCTCCTATC      | TCTCGATTTGGAAGGGAGAA      |
| <i>TsGPX8</i>   | GGCCAGAAATCTGTTTACGA      | TGGTCAGTAGTTCCCGGTTT      |
| <i>TsTublin</i> | GTCAGTCTGGTGC GG GTAAC    | CCAGATCCAGTTCCTCCTCCC     |

**Figure S1.** Electrophoretogram for isolating CDs of *TsGPX3*, *TsGPX5* and *TsGPX7*. (A) Total RNA; (B) cDNA quality testing; (C) 3' RACE for *TsGPX3*, *TsGPX5*; (D) 3' RACE for *TsGPX7*, 71 and 72: PCR product using inner primers; 73 and 74: PCR product using outer primers.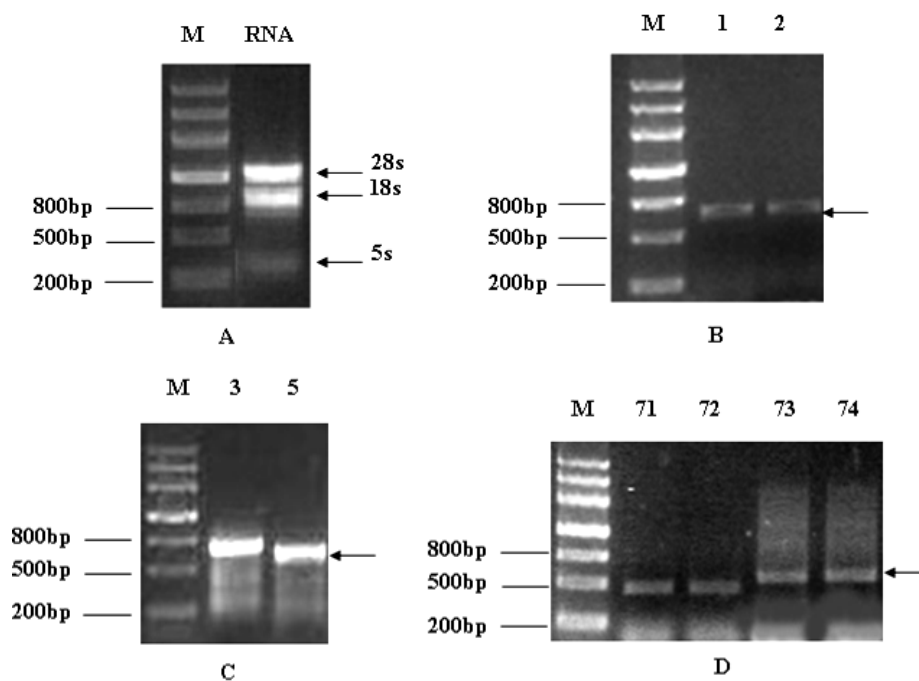

**Figure S2.** The relative water contents of the *Thellungiella salsuginea* leaves during PEG 6000 treatment. Data are means  $\pm$  SE of at least six replicates.

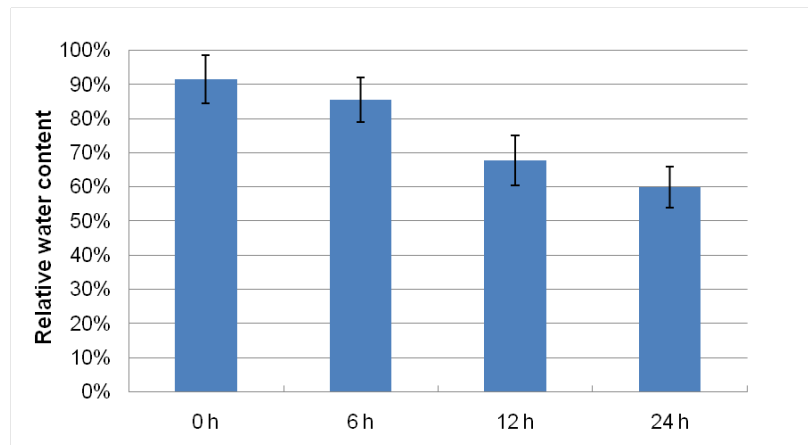

**Figure S3.** The water potentials of the *Thellungiella salsuginea* leaves during NaCl treatment. Data are means  $\pm$  SE of at least eight replicates.

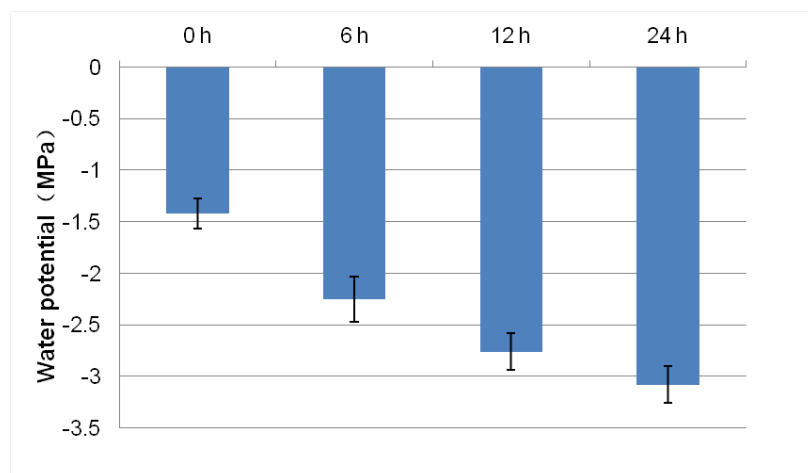

Supplement: ijms-15-03319-s001.pdf [file ijms-15-03319-s001.pdf]
